# Supplementary material
Source: PubMed Central journal article supplement (PMC5674192)

**Figure S2. Protective efficacy of immunization with MTBK\_24820 in mice against the *M. tb* Erdman strain.** Mice immunized with MTBK\_24820 were challenged with 1,000 CFUs of Erdman strain. At 4- and 10-weeks post infection, the bacterial burden (CFUs) was measured from homogenized lungs (A) and spleens (B). Dots represent the mean log<sub>10</sub> values obtained for individually tested animals, and lines represent the means ± S.D from five mice. Significant differences between multiple groups were confirmed by one-way ANOVA (\*P<0.05, \*\*P<0.01, \*\*\*P<0.001).

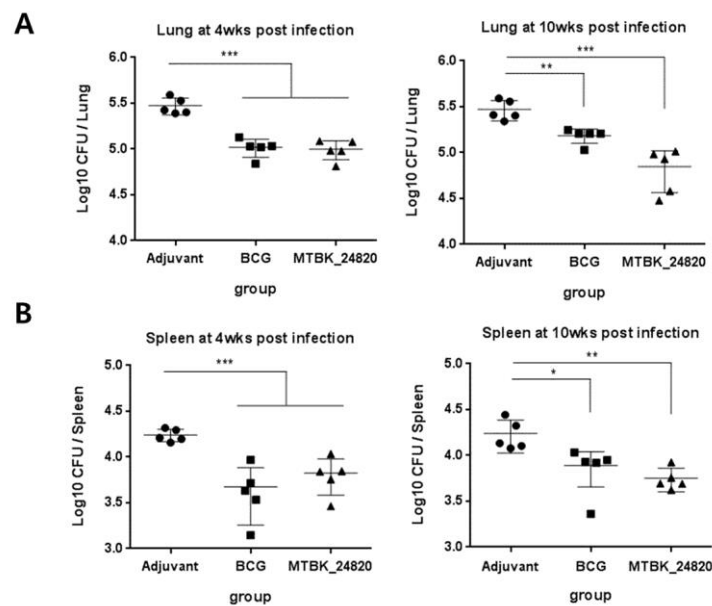

Supplement: CVI.00219-17_zcd999095532s2.pdf [file CVI.00219-17_zcd999095532s2.pdf]
