# Supplementary material
Source: PubMed Central journal article supplement (PMC5674192)

**Figure S3. A.** A recombinant MTBK\_24820 was overexpressed and purified in *E. coli* using histidine affinity chromatography followed by a FPLC purification method. The peak marked with asterisk (\*) indicates the purified MTBK\_24820 using MonoQ anion exchange columns on an Ä KTA-FPLC system (Left panel). The purified MTBK\_24820 (approximately 60 kDa) was confirmed by SDS-PAGE. Lanes: M; marker, 1; 10 µg of MTBK\_24820. (Right panel) **B.** Synthetic peptides overlapped by six amino acids including the N-terminus of MTBK\_24820 were designed and dissolved in PBS. Final concentration of the each overlapping peptide was 10 µg/mL in RPMI media.

**A**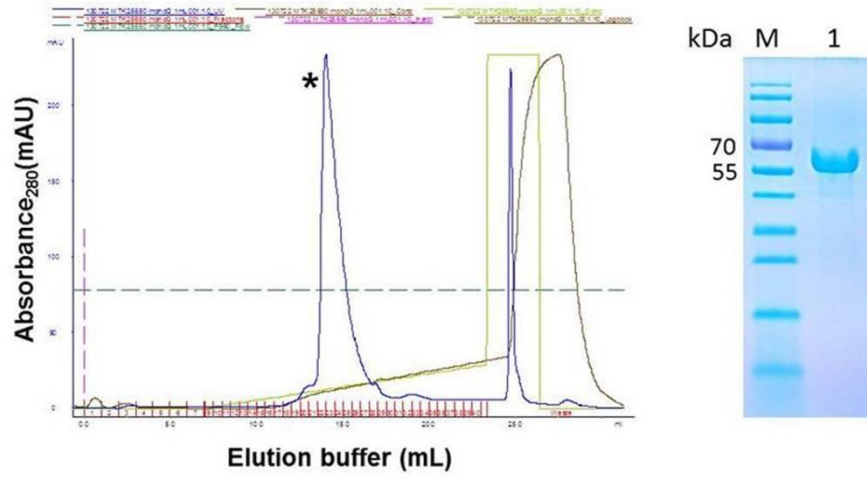**B**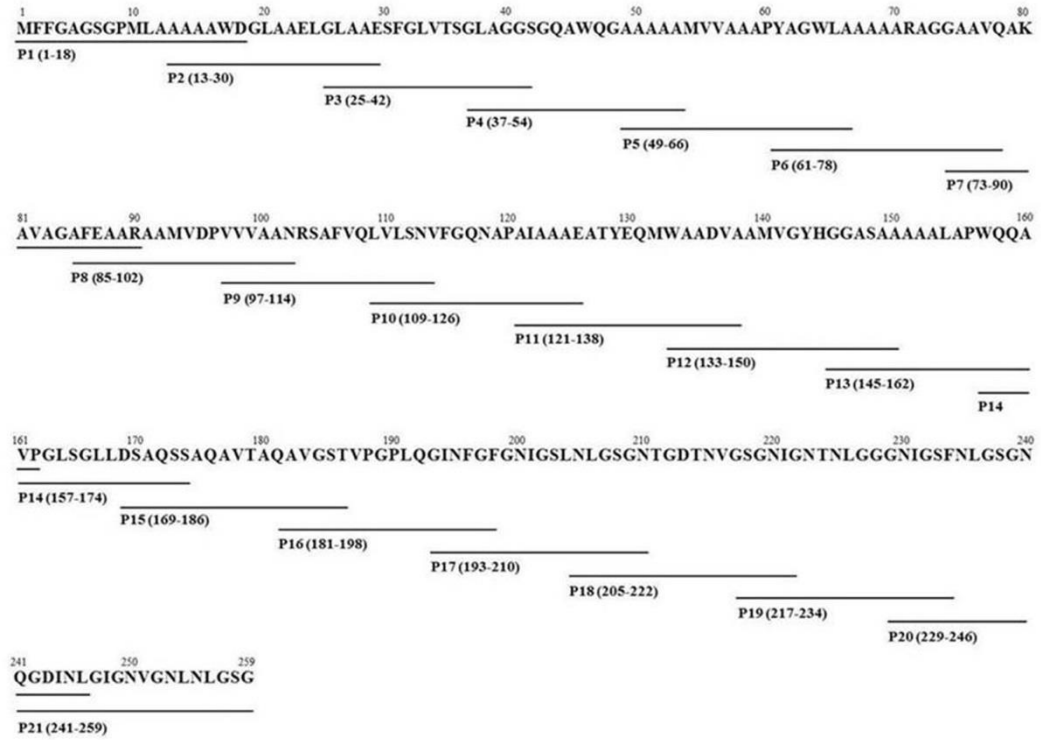

Supplement: CVI.00219-17_zcd999095532s3.pdf [file CVI.00219-17_zcd999095532s3.pdf]
