# Supplementary material
Source: PubMed Central journal article supplement (PMC5674192)

**Figure S4. The gating strategy using Flowjo program.** The gating strategy was used to determine the frequency of the seven CD4<sup>+</sup> or CD8<sup>+</sup> T cell subsets, each expressing one of the possible combinations of IFN- $\gamma$ , TNF- $\alpha$  and IL-17A. Splenocytes stimulated with MTBK\_24820 were firstly gated for lymphocytes (SSC-A vs. FSC-A). The lymphocytes were further analyzed for CD4<sup>+</sup>/CD44<sup>+</sup> and CD8<sup>+</sup>/CD44<sup>+</sup> T cells. The gated CD4<sup>+</sup>/CD44<sup>+</sup> or CD8<sup>+</sup>/CD44<sup>+</sup> T cells expressing INF- $\gamma$  were categorized into the cells expressing TNF- $\alpha$  and IL-17A.

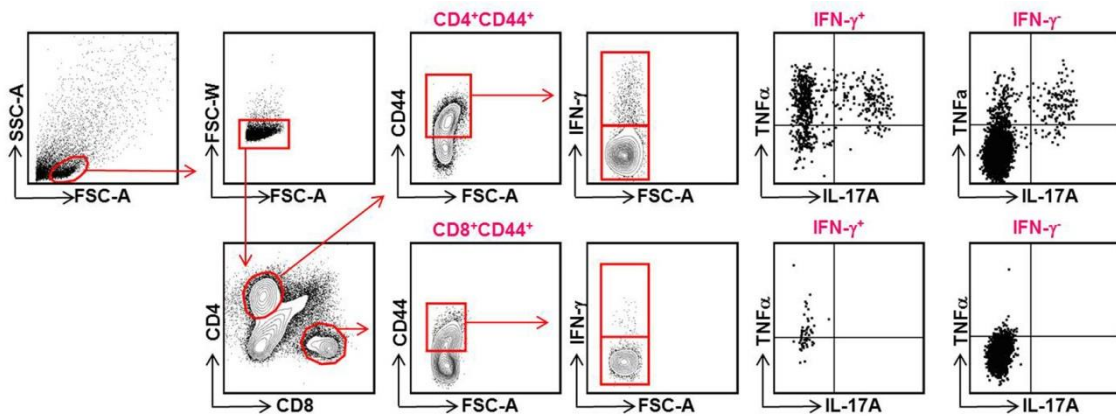

Supplement: CVI.00219-17_zcd999095532s4.pdf [file CVI.00219-17_zcd999095532s4.pdf]
